RETRACTION

# Retraction: Dynamic risk spillover effect and path of risk transmission across industrial sectors in China during COVID-19 epidemic

The *PLOS One* Editors

The *PLOS One* Editors retract this article [1] because it was identified as one of a series of submissions for which we have concerns about potential manipulation of the publication process, peer review integrity, and authorship. These concerns call into question the validity and provenance of the reported results. We regret that the issues were not identified prior to the article's publication.

LL, HK, LQ, and ZZ did not agree with the retraction. JL and IK either did not respond directly or could not be reached.

## Reference

1. Ling L, Khan H, Lingwei J, Qiumei L, Zuominyang Z, Khan I. Dynamic risk spillover effect and path of risk transmission across industrial sectors in China during COVID-19 epidemic. *PLoS One*. 2023;18(10):e0292859. <https://doi.org/10.1371/journal.pone.0292859> PMID: [37831727](https://pubmed.ncbi.nlm.nih.gov/37831727/)

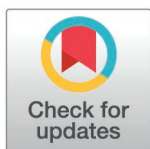

## OPEN ACCESS

**Citation:** The *PLOS One* Editors (2025) Retraction: Dynamic risk spillover effect and path of risk transmission across industrial sectors in China during COVID-19 epidemic. *PLoS One* 20(9): e0332078. <https://doi.org/10.1371/journal.pone.0332078>

**Published:** September 10, 2025

**Copyright:** © 2025 The *PLOS One* Editors. This is an open access article distributed under the terms of the [Creative Commons Attribution License](https://creativecommons.org/licenses/by/4.0/), which permits unrestricted use, distribution, and reproduction in any medium, provided the original author and source are credited.
